# Supplementary material for: Antifungal properties of volatile organic compounds produced by Daldinia eschscholtzii MFLUCC 19-0493 isolated from Barleria prionitis leaves against Colletotrichum acutatum and its post-harvest infections on strawberry fruits
Source: PeerJ. 2021 Apr 16;9:e11242. doi: 10.7717/peerj.11242 (PMC8054736; doi:10.7717/peerj.11242)
Supplement: File S1 — All data are in the tables and figures. [file peerj-09-11242-s001.xlsx]

## Sheet: in vitro_pure compound
																	Table 3, Fig. 4 and Fig. 5
1	concentration	0.28	Compound	3,5-dimethyl-4-heptanone	ethyl sorbate	benzaldehyde dimethyl acetal	trans-sabinene hydrate	methyl geranate	elemicin		1	concentration	0.56	Compound	3,5-dimethyl-4-heptanone	ethyl sorbate	benzaldehyde dimethyl acetal	trans-sabinene hydrate	methyl geranate	elemicin		1	concentration	1.12	Compound	3,5-dimethyl-4-heptanone	ethyl sorbate	benzaldehyde dimethyl acetal	trans-sabinene hydrate	methyl geranate	elemicin
			1	22.11	20.05	23.34	23.76	24.33	32.48					1	30.61	35.56	32.12	50.09	32.09	58.83					1	45.34	56	50.09	68.34	42.12	76.65
			3	18.38	10.01	13.22	11.14	18.37	28.33					3	24.72	22.22	15.08	39.22	20.77	55.23					3	35.23	43.66	31.22	55.43	30.45	75.11
			5	8.34	0	0	0	9.34	20.94					5	14.29	9.65	0	20.03	10.39	52.41					5	25.39	28.12	10.66	43.11	17.74	70.34
			7	0	0	0	0	0	15.33					7	0	0	0	10.09	0	46.29					7	15.33	13.45	0	21.09	8.34	62.41
2	concentration	0.28	Compound	3,5-dimethyl-4-heptanone	ethyl sorbate	benzaldehyde dimethyl acetal	trans-sabinene hydrate	methyl geranate	elemicin		2	concentration	0.56	Compound	3,5-dimethyl-4-heptanone	ethyl sorbate	benzaldehyde dimethyl acetal	trans-sabinene hydrate	methyl geranate	elemicin		2	concentration	1.12	Compound	3,5-dimethyl-4-heptanone	ethyl sorbate	benzaldehyde dimethyl acetal	trans-sabinene hydrate	methyl geranate	elemicin
			1	22	20	23	23.7	24.33	32.5					1	30.6	35.6	32.2	50.1	32.1	59					1	45.23	56.89	50.14	68.24	42.23	76.28
			3	18.4	10.1	13.23	11	18.2	28					3	24.82	22.2	15.09	39	20.8	55.3					3	35.32	43.56	31.25	55.36	30.52	75.26
			5	8.33	0	0	0	9.3	20.8					5	14.3	9.75	0	20.06	10.41	52.42					5	25.63	28.24	10.36	43.25	17.25	70.24
			7	0	0	0	0	0	15.23					7	0	0	0	11	0	46.3					7	15.23	13.26	0	21.14	8.39	62.45
3	concentration	0.28	Compound	3,5-dimethyl-4-heptanone	ethyl sorbate	benzaldehyde dimethyl acetal	trans-sabinene hydrate	methyl geranate	elemicin		3	concentration	0.56	Compound	3,5-dimethyl-4-heptanone	ethyl sorbate	benzaldehyde dimethyl acetal	trans-sabinene hydrate	methyl geranate	elemicin		3	concentration	1.12	Compound	3,5-dimethyl-4-heptanone	ethyl sorbate	benzaldehyde dimethyl acetal	trans-sabinene hydrate	methyl geranate	elemicin
			1	21	19.9	23	23.8	24.22	32.34					1	30.7	35.7	33	50.2	32.04	58.87					1	45.12	56.38	50.15	68.45	42.36	76.58
			3	18.33	10.2	13.12	11.1	18.2	28.21					3	24.78	22.11	15.11	38.8	20.78	55.23					3	35.26	43.26	31.45	55.32	30.12	75.14
			5	8.23	0	0	0	9.23	20.43					5	14.28	9.77	0	20.14	10.42	52.44					5	25.36	28.14	10.41	43.25	17.26	70.25
			7	0	0	0	0	0	15.21					7	0	0	0	10.56	0	46.21					7	15.14	13.25	0	21.45	8.35	62.14
4	concentration	0.28	Compound	3,5-dimethyl-4-heptanone	ethyl sorbate	benzaldehyde dimethyl acetal	trans-sabinene hydrate	methyl geranate	elemicin		4	concentration	0.56	Compound	3,5-dimethyl-4-heptanone	ethyl sorbate	benzaldehyde dimethyl acetal	trans-sabinene hydrate	methyl geranate	elemicin		4	concentration	1.12	Compound	3,5-dimethyl-4-heptanone	ethyl sorbate	benzaldehyde dimethyl acetal	trans-sabinene hydrate	methyl geranate	elemicin
			1	22.3	19.98	23.3	23.76	24.3	32.32					1	30.71	35.78	32.98	50.12	30.25	58.5					1	45.26	56.11	50.14	68.14	42.03	76.32
			3	18.32	9.98	13.11	11	18.21	28.2					3	24.75	22.14	15.09	38.75	20.71	55.14					3	35.12	43.26	31.25	55.24	30.01	75.14
			5	8.33	0	0	0	9.22	20.89					5	14.21	9.71	0	20	10.5	52.74					5	25.21	28.14	10.14	43.25	17.16	70.24
			7	0	0	0	0	0	15.22					7	0	0	0	10.61	0	46.3					7	15.21	13.01	0	21.14	8.25	62.45
5	concentration	0.28	Compound	3,5-dimethyl-4-heptanone	ethyl sorbate	benzaldehyde dimethyl acetal	trans-sabinene hydrate	methyl geranate	elemicin		5	concentration	0.56	Compound	3,5-dimethyl-4-heptanone	ethyl sorbate	benzaldehyde dimethyl acetal	trans-sabinene hydrate	methyl geranate	elemicin		5	concentration	1.12	Compound	3,5-dimethyl-4-heptanone	ethyl sorbate	benzaldehyde dimethyl acetal	trans-sabinene hydrate	methyl geranate	elemicin
			1	22.1	20.05	23.3	23.7	24.3	32.34					1	30.74	35.5	33	50.1	30.6	58.1					1	45.12	56.85	50.17	68.15	42.15	76.05
			3	18.38	10.01	13.22	11.14	18.37	28.33					3	24.7	22.1	15.11	38.7	20.8	55.2					3	35.14	43.25	31.11	55.24	30.08	75.26
			5	8.43	0	0	0	9.31	20.85					5	14.22	9.81	0	20.14	10.18	52.75					5	25.24	28.17	10.19	43.25	17.15	70.36
			7	0	0	0	0	0	15.34					7	0	0	0	10.77	0	46.7					7	15.24	13.14	0	21.15	8.24	62.35
6	concentration	0.28	Compound	3,5-dimethyl-4-heptanone	ethyl sorbate	benzaldehyde dimethyl acetal	trans-sabinene hydrate	methyl geranate	elemicin		6	concentration	0.56	Compound	3,5-dimethyl-4-heptanone	ethyl sorbate	benzaldehyde dimethyl acetal	trans-sabinene hydrate	methyl geranate	elemicin		6	concentration	1.12	Compound	3,5-dimethyl-4-heptanone	ethyl sorbate	benzaldehyde dimethyl acetal	trans-sabinene hydrate	methyl geranate	elemicin
			1	22.12	20.09	23.32	23.78	24.3	32.43					1	30.8	36	33.5	51.4	30.64	58.1					1	45.26	56.22	50.14	68.18	42.15	76.25
			3	18.34	10.03	13.24	11.15	18.33	28					3	24.8	22.11	15.14	37.7	20.75	55.19					3	35.26	43.15	31.47	55.28	30.009	75.58
			5	8.3	0	0	0	9.43	20.89					5	14.32	9.74	0	20.24	10.52	52.89					5	25.12	28.14	10.19	43.26	17.48	70.25
			7	0	0	0	0	0	15.11					7	0	0	0	10.74	0	46.88					7	15.14	13.05	0	21.14	8.22	62.58
7	concentration	0.28	Compound	3,5-dimethyl-4-heptanone	ethyl sorbate	benzaldehyde dimethyl acetal	trans-sabinene hydrate	methyl geranate	elemicin		7	concentration	0.56	Compound	3,5-dimethyl-4-heptanone	ethyl sorbate	benzaldehyde dimethyl acetal	trans-sabinene hydrate	methyl geranate	elemicin		7	concentration	1.12	Compound	3,5-dimethyl-4-heptanone	ethyl sorbate	benzaldehyde dimethyl acetal	trans-sabinene hydrate	methyl geranate	elemicin
			1	22	20.05	23.1	23.45	24.33	32.44					1	30.76	36.1	33.52	52	30.57	58.87					1	45.26	56.25	50.21	68.14	42.26	76.58
			3	18.4	10	13.43	11.18	18.3	28.34					3	24.87	22.15	15.12	37.74	20.84	55.2					3	35.14	43.62	31.58	55.24	30.18	75.28
			5	8.23	0	0	0	9.31	20.99					5	14.25	9.84	0	20.24	10.55	52.7					5	25.14	28.16	10.17	43.28	17.25	70.65
			7	0	0	0	0	0	15.39					7	0	0	0	10.77	0	47					7	15.26	13.25	0	21.17	8.42	62.41
8	concentration	0.28	Compound	3,5-dimethyl-4-heptanone	ethyl sorbate	benzaldehyde dimethyl acetal	trans-sabinene hydrate	methyl geranate	elemicin		8	concentration	0.56	Compound	3,5-dimethyl-4-heptanone	ethyl sorbate	benzaldehyde dimethyl acetal	trans-sabinene hydrate	methyl geranate	elemicin		8	concentration	1.12	Compound	3,5-dimethyl-4-heptanone	ethyl sorbate	benzaldehyde dimethyl acetal	trans-sabinene hydrate	methyl geranate	elemicin
			1	22.13	20.04	23.33	23.8	24.2	32.5					1	30.91	36.15	33.62	52.14	30.68	58.9					1	45.16	56.89	50.22	68.14	42.36	76.65
			3	18.4	10.01	13.2	11.26	18.33	28.21					3	24.92	22.21	15.14	37.81	20.88	55.14					3	35	43.14	31.58	55.48	30.19	75.48
			5	8.3	0	0	0	9.29	20.87					5	14.26	9.84	0	20.36	10.61	52.71					5	25.47	28.18	10.11	43.25	17.56	70.14
			7	0	0	0	0	0	15.39					7	0	0	0	10.45	0	47.23					7	15.16	13.28	0	21.18	8.27	62.11
9	concentration	0.28	Compound	3,5-dimethyl-4-heptanone	ethyl sorbate	benzaldehyde dimethyl acetal	trans-sabinene hydrate	methyl geranate	elemicin		9	concentration	0.56	Compound	3,5-dimethyl-4-heptanone	ethyl sorbate	benzaldehyde dimethyl acetal	trans-sabinene hydrate	methyl geranate	elemicin		9	concentration	1.12	Compound	3,5-dimethyl-4-heptanone	ethyl sorbate	benzaldehyde dimethyl acetal	trans-sabinene hydrate	methyl geranate	elemicin
			1	22.33	20.05	23.34	23.77	24.4	32.5					1	30.88	36.11	33.67	52.11	30.7	58					1	45.68	56.87	50.26	68.84	42.25	76.58
			3	18.49	10.13	13.29	11.23	19	29.1					3	24.88	22.11	15.1	37.77	20.14	55.21					3	35.16	43.58	31.74	55.74	30.2	75.44
			5	8.33	0	0	0	9.33	21.1					5	14	9.7	0	20.21	10.11	52.1					5	25.71	28.81	10.52	43.65	17.2	70.22
			7	0	0	0	0	0	15.41					7	0	0	0	10.4	0	47.1					7	15.22	13.11	0	21.17	8.26	62.17
10	concentration	0.28	Compound	3,5-dimethyl-4-heptanone	ethyl sorbate	benzaldehyde dimethyl acetal	trans-sabinene hydrate	methyl geranate	elemicin		10	concentration	0.56	Compound	3,5-dimethyl-4-heptanone	ethyl sorbate	benzaldehyde dimethyl acetal	trans-sabinene hydrate	methyl geranate	elemicin		10	concentration	1.12	Compound	3,5-dimethyl-4-heptanone	ethyl sorbate	benzaldehyde dimethyl acetal	trans-sabinene hydrate	methyl geranate	elemicin
			1	22	20.05	23.38	23.76	24.3	32.51					1	30.7	36.1	33.61	52.17	30.5	59.14					1	45.11	56.23	50.44	68.25	42.22	76.66
			3	18.5	10.1	13.28	11.23	18.21	28.11					3	24.5	22	16.1	38	21	56.1					3	35.28	43.22	31.58	55.81	30.21	75.21
			5	8.31	0	0	0	9.4	21.21					5	13.24	9.9	0	20.1	10.17	53.1					5	25.14	28.87	10.24	43.22	17.14	70.21
			7	0	0	0	0	0	15.4					7	0	0	0	11.4	0	47.78					7	15.24	13.24	0	21.47	8.59	62.58
11	concentration	0.28	Compound	3,5-dimethyl-4-heptanone	ethyl sorbate	benzaldehyde dimethyl acetal	trans-sabinene hydrate	methyl geranate	elemicin		11	concentration	0.56	Compound	3,5-dimethyl-4-heptanone	ethyl sorbate	benzaldehyde dimethyl acetal	trans-sabinene hydrate	methyl geranate	elemicin		11	concentration	1.12	Compound	3,5-dimethyl-4-heptanone	ethyl sorbate	benzaldehyde dimethyl acetal	trans-sabinene hydrate	methyl geranate	elemicin
			1	23	21	23.3	23	24.34	32.5					1	31.2	36.14	34.1	53.1	31.24	59					1	45.25	56.25	50.14	68.55	42.25	76.69
			3	19	10	14	12.1	18.3	29.1					3	24	21.58	16.8	38.45	22.14	55.8					3	35.24	43.26	31.11	55.21	30.05	75.58
			5	8.35	0	0	0	9.31	21					5	13.14	10.25	0	21.23	10.16	53					5	25.22	28.55	10.25	43.65	17.15	70.22
			7	0	0	0	0	0	15.4					7	0	0	0	12.56	0	48.36					7	15.21	13.02	0	21.25	8.25	62.55
12	concentration	0.28	Compound	3,5-dimethyl-4-heptanone	ethyl sorbate	benzaldehyde dimethyl acetal	trans-sabinene hydrate	methyl geranate	elemicin		12	concentration	0.56	Compound	3,5-dimethyl-4-heptanone	ethyl sorbate	benzaldehyde dimethyl acetal	trans-sabinene hydrate	methyl geranate	elemicin		12	concentration	1.12	Compound	3,5-dimethyl-4-heptanone	ethyl sorbate	benzaldehyde dimethyl acetal	trans-sabinene hydrate	methyl geranate	elemicin
			1	23	21	23.34	24	24.33	32.4					1	32.05	36.25	34	53.26	32.14	59.14					1	45.22	56.21	50.14	68.8	42.31	76.24
			3	18.8	10.1	13.22	11.17	18.33	28.11					3	24.12	22.15	17.25	38.45	22.16	55.9					3	35.22	43.69	31.78	55.89	30.17	75.28
			5	8.22	0	0	0	9.42	20.92					5	14.25	11.14	0	22.45	11.23	53.25					5	25.14	28.22	10.24	43.26	17.11	62.58
			7	0	0	0	0	0	15.22					7	0	0	0	13.11	0	43.1					7	15.14	13.26	0	21.29	8.29	62.55
13	concentration	0.28	Compound	3,5-dimethyl-4-heptanone	ethyl sorbate	benzaldehyde dimethyl acetal	trans-sabinene hydrate	methyl geranate	elemicin		13	concentration	0.56	Compound	3,5-dimethyl-4-heptanone	ethyl sorbate	benzaldehyde dimethyl acetal	trans-sabinene hydrate	methyl geranate	elemicin		13	concentration	1.12	Compound	3,5-dimethyl-4-heptanone	ethyl sorbate	benzaldehyde dimethyl acetal	trans-sabinene hydrate	methyl geranate	elemicin
			1	23	21	24	24	24.4	33					1	31.44	37.24	35.02	52.11	32.11	59.12					1	45.69	56.22	50.19	68.52	42.18	76.22
			3	19.1	10.3	13.3	12.1	19	29.1					3	24.22	23.45	18.23	38.26	21.98	57.89					3	35.24	43.69	31.28	55.24	30.11	75.21
			5	8.31	0	0	0	9.31	21					5	15.23	11.56	0	23.84	11.57	53.14					5	25.11	28.25	10.29	43.25	17.12	62.22
			7	0	0	0	0	0	15.11					7	0	0	0	13	0	41.25					7	15.26	13.25	0	21.78	8.42	62.14
14	concentration	0.28	Compound	3,5-dimethyl-4-heptanone	ethyl sorbate	benzaldehyde dimethyl acetal	trans-sabinene hydrate	methyl geranate	elemicin		14	concentration	0.56	Compound	3,5-dimethyl-4-heptanone	ethyl sorbate	benzaldehyde dimethyl acetal	trans-sabinene hydrate	methyl geranate	elemicin		14	concentration	1.12	Compound	3,5-dimethyl-4-heptanone	ethyl sorbate	benzaldehyde dimethyl acetal	trans-sabinene hydrate	methyl geranate	elemicin
			1	22.2	20.1	24	24	24.5	32.5					1	32.14	38.21	36.05	52.04	32.09	59.1					1	45.26	56.22	50.14	68.25	42.11	76.55
			3	18.4	10.2	13.3	12.4	18.5	29					3	24.12	23.15	18.26	38.25	21.84	57.11					3	35.21	43.25	31.06	55.08	30.18	75.09
			5	8.3	0	0	0	9.3	21					5	15.26	11.81	0	23.05	11.47	53.08					5	25.14	28.26	10.56	43.26	17.26	62.25
			7	0	0	0	0	0	15.38					7	0	0	0	14.15	0	42.89					7	15.26	13.05	0	21.78	8.21	62.11
15	concentration	0.28	Compound	3,5-dimethyl-4-heptanone	ethyl sorbate	benzaldehyde dimethyl acetal	trans-sabinene hydrate	methyl geranate	elemicin		15	concentration	0.56	Compound	3,5-dimethyl-4-heptanone	ethyl sorbate	benzaldehyde dimethyl acetal	trans-sabinene hydrate	methyl geranate	elemicin		15	concentration	1.12	Compound	3,5-dimethyl-4-heptanone	ethyl sorbate	benzaldehyde dimethyl acetal	trans-sabinene hydrate	methyl geranate	elemicin
			1	22	23	23	23	24	33					1	33.25	38.14	36.25	52.14	32.1	58.77					1	45.26	56.66	50.12	68.12	42.15	76.25
			3	18.3	10.2	13.2	11.4	18.9	29					3	24.21	23.52	18.36	38.22	21.56	57.26					3	35.22	43.15	31.02	55.26	30.14	75.21
			5	8.54	0	0	0	9.21	20.84					5	15.36	12.59	0	23.14	11.89	53.82					5	25.12	28.23	10.26	43.28	17.26	62.58
			7	0	0	0	0	0	15.34					7	0	0	0	14.36	0	43.84					7	15.28	13.08	0	21.58	8.25	62.04

## Sheet: screening
	Fig. 1
	1	2	3	4	5	6	7	8	9	10	11	12	13	14	15
BP1	20.58	20.58	20.54	20.36	20.58	20.36	20.14	20.69	20.56	20.36	20.14	20.15	21	22.06	20.37
BP2	24.99	25	24.9	25.32	24.99	24.88	25.03	25.06	25.07	25.14	25.18	25	25	25	25
BP3	29.27	30	29.89	29.99	29.87	29.24	30.01	30	30.25	30.65	30.21	30.02	24.78	24.58	26
BP4	4.14	4	0	5.12	5.13	5.21	5	5	0	5	5	6.32	6.21	6	6
BP5	6.59	6.59	6.28	6.38	6.58	6.47	6.25	6.38	6.94	6.87	6.54	6.32	6.35	6.54	6.58
BP6	12.94	12.94	13	13.21	13.11	12.95	12.78	12.65	12.58	12.56	12.34	12.03	13.02	13.25	13.25
BP7	52.34	52.3	52.14	53.25	52.16	52.14	52.03	52.36	52.09	52.09	52.07	52.03	52.14	52.22	52.31
BP8	23.52	23.55	23.36	23.21	23.14	23.22	23.55	23.64	23.54	23.85	23.69	23.56	23.14	23.14	23.56
BP9	11.38	11.33	11.25	11.24	11.36	11.02	11.25	11.25	11.36	11.15	11.45	11.78	11.25	11.36	11.22
BP10	3.32	3	0	3.5	3.8	3.2	3.6	3.8	3.3	3.2	3	0	3.2	3.4	2.9
BP11	80.79	82.56	80.24	81	82.56	82.22	83.14	83.14	82.12	81	80.59	81	82	82.14	82.23
BP12	33.42	33.24	33.21	33.33	33	32.14	33.69	33.25	33.25	33.14	33.22	33.01	33.02	33.08	33.14
BP13	41.36	41.11	41.12	41	41.03	41.25	41.36	41.58	41.32	41.52	41.55	41.05	41.65	41.25	41.11
BP14	9.77	9.7	9.8	9.52	9.36	9.25	9.9	9.35	9.55	9.23	9.2	9.25	9.31	9	9.33
BP15	19.8	19.87	19.55	19.25	19.36	19.25	19.3	19	19	18.65	18.74	19.36	19.99	19	19
BP16	4.13	4	4.2	4	4.1	4.06	4.08	5.01	4.2	4	4.05	4.13	4.18	4	5
BP17	49.98	49.96	49.25	49.36	49.25	49.22	49	50	51.23	50.24	51	49.87	48.58	48.9	49.9
BP18	61.65	61.25	61.28	61	62.5	63.4	62.14	61.59	61.02	61.25	61.3	61.25	61.44	61.24	61
BP19	20.57	20.55	20.14	20.36	20.45	20.89	20.56	20	21.05	21.63	23	21	22.15	22.14	21.07
BP20	52.34	52.4	52.21	52.16	52.32	52.14	52.28	52	53.2	53.1	5306	52.7	52089	52.7	52.86
BP21	49.4	49.54	49.9	49.58	49.78	49.05	49	49	49.25	49.26	49.12	49.14	49.25	49.23	49
BP22	38.76	37.8	37.25	37.29	37.25	37.56	37.89	37.55	37.45	37.89	37.14	37	38	38	38
BP23	56.85	56.87	56	56.78	52.47	56	56.24	56.28	56.47	56.47	56.23	56.14	56.88	56.74	56.41
BP24	63.69	63.9	63.54	63.25	63.1	63.15	63.58	63.47	63.25	63.5	63.58	63.49	63.21	63.25	63.33
BP25	20.58	20.5	20.56	20.2	20.31	20.89	20.8	20.8	20.89	20.45	20.56	20.36	20.45	20.78	20.88
BP26	20.58	20	20.5	20.36	20.14	20.15	20.85	20.89	20.14	20.15	20.63	20.45	20	20	19

## Sheet: BP11
	Fig. 2
	inhibition (%)
day	1	2	3	4	5	6	7	8	9	10	11	12	13	14	15
1	54.25	54.2	54.26	54	54.56	54.2	54.13	54.44	54.23	54.12	54.22	54.23	54.26	54.22	54.26
2	73.45	73.4	73.45	73.25	73.56	3.22	73.54	73.21	73.45	73.05	73.5	73.44	73.8	73.58	73.51
3	75.23	75.2	75.32	75.23	75.4	75.12	75.13	75.22	75.14	75.14	75.23	75.14	75.16	75	75
4	79.34	79.3	79.3	79.35	79.3	79.25	79.46	79.25	79	79	79.55	79.45	79.23	79.12	79
5	80.03	80	80.12	80.35	80.26	80.25	80.22	80.14	80.26	80.37	80.28	80.24	80.32	80.22	80.31
6	80.29	80.29	804	805	80.62	80.65	80.65	80.5	80.66	80.55	80.15	80.16	80.78	80.88	80.9
7	80.15	80.1	80.02	80.15	80.03	80	80	80	79.14	79.14	79.9	79.58	79.58	80	80.1

## Sheet: in vivo
Table 1
		% inhibition				% severity				% incidence
BP11	1	2	3		1	2	3		1	2	3
1	72.35	72.33	72.25		19.85	18.8	19.87		15.63	15.6	15.74
2	72	72.21	72.23		19.8	18.78	19.88		15.6	15.21	15.14
3	72.3	72.25	72		19.8	18.85	19.25		15.47	15.03	15.23
4	72.25	72.52	71.98		20.1	19.9	19.58		15.47	15.24	15.06
5	72.55	73	71.99		20.14	19.2	19.25		15.74	15.24	15.08
6	72.33	74.5	72.56		20	19.56	18.88		15.24	15.06	15.24
7	72.1	75.2	72.55		19.99	19.24	18.25		15	15.22	15
8	72.08	75	73.04		19.9	19.23	18.74		15	15.4	16
9	72.14	74	73.08		19.89	19.87	18.56		15	15.23	15.21
10	72.15	72.5	73.25		19.78	19.58	18		15.24	15.08	15.23
11	72.3	72.36	73.26		19.23	19.56	18		15.23	15.47	15.44
12	72.3	72.54	74.08		19.87	19.55	19.5		15.44	15.08	15.28
13	72.34	73.26	74.01		20.14	18.05	19.63		15.02	15.2	15.14
14	72.5	73.25	74		19.8	18.02	19.88		15	15.1	15
15	72.36	74	74		18	18	19.75		15.02	15.02	14.21
		% inhibition				% severity				% incidence
elemicin	1	2	3		1	2	3		1	2	3
1	70.84	70.8	70.5		21.5	21.52	21.45		15.88	15.8	15.8
2	70.88	70.82	70.85		21.4	21.56	21.55		15.8	15.8	15.29
3	71.21	70.87	70.52		21.21	21.44	21.44		15.89	15.88	15.8
4	71.45	70.85	71		21.14	21.58	21.52		15.9	15.84	15.84
5	70.21	70.25	71		21.08	21.5	22.14		15.8	15.2	15.84
6	70.1	70.14	71.2		22	21.5	21		15.96	15.82	15.82
7	69.2	70.25	71.02		21.4	21.5	21		15.9	15.8	15.87
8	68.25	70.25	70.8		21.25	21.5	21.32		15.74	15.26	18.23
9	70	70.36	70.85		21.2	22	21.14		15.24	15.22	15.26
10	70	70.22	70.88		21.23	21.5	21.15		15.7	15.22	15.8
11	70.58	70.55	70.98		21.25	21.5	21.33		15.62	15.23	14.25
12	70.23	70.56	71		21.56	21.4	21.04		15.6	15.26	14.69
13	70.56	70.89	71		21.14	21.7	21.25		15.2	15.47	14.66
14	70.25	71	71.54		21.58	21.45	21.55		15.24	15.27	15.8
15	70.58	71	70		21	21.5	22.05		15.51	15.8	15.87

## Sheet: quality
Table 4
		Fruit firmness (N)				Total soluble solids (%)				pH
BP11	1	2	3		1	2	3		1	2	3
1	3.86	3.86	3.86		7.76	7.75	7.75		3.34	3.34	3.34
2	3.86	3.86	3.86		7.71	7.74	7.75		3.34	3.34	3.34
3	3.86	3.86	3.86		7.71	7.74	7.75		3.34	3.34	3.34
4	3.86	3.86	3.86		7.71	7.74	7.75		3.34	3.34	3.34
5	3.86	3.86	3.86		7.71	7.74	7.75		3.34	3.34	3.34
6	3.86	3.86	3.86		7.71	7.74	7.75		3.34	3.34	3.34
7	3.86	3.86	3.86		7.71	7.74	7.75		3.34	3.34	3.34
8	3.86	3.86	3.86		7.71	7.74	7.75		3.34	3.34	3.34
9	3.86	3.86	3.86		7.71	7.74	7.75		3.34	3.34	3.34
10	3.86	3.86	3.86		7.71	7.74	7.75		3.34	3.34	3.34
11	3.86	3.86	3.86		7.71	7.74	7.75		3.34	3.34	3.34
12	3.86	3.86	3.86		7.71	7.74	7.75		3.34	3.34	3.34
13	3.86	3.86	3.86		7.71	7.74	7.75		3.34	3.34	3.34
14	3.86	3.86	3.86		7.71	7.74	7.75		3.34	3.34	3.34
15	3.86	3.86	3.86		7.71	7.74	7.75		3.34	3.34	3.34
		Fruit firmness (N)				Total soluble solids (%)				pH
elemicin	1	2	3		1	2	3		1	2	3
1	3.87	3.87	3.87		7.73	7.73	7.73		3.33	3.33	3.33
2	3.87	3.87	3.87		7.73	7.73	7.74		3.33	3.33	3.33
3	3.87	3.87	3.87		7.73	7.73	7.73		3.33	3.33	3.33
4	3.87	3.87	3.87		7.73	7.73	7.73		3.33	3.33	3.33
5	3.87	3.87	3.87		7.73	7.73	7.73		3.33	3.33	3.33
6	3.87	3.87	3.87		7.73	7.7	7.74		3.33	3.33	3.33
7	3.82	3.87	3.87		7.73	7.73	7.73		3.33	3.33	3.33
8	3.82	3.87	3.87		7.73	7.73	7.73		3.33	3.33	3.33
9	3.83	3.87	3.87		7.73	7.73	7.73		3.33	3.33	3.33
10	3.84	3.87	3.87		7.73	7.73	7.73		3.33	3.33	3.33
11	3.87	3.87	3.87		7.73	7.73	7.73		3.33	3.33	3.33
12	3.87	3.87	3.87		7.73	7.73	7.73		3.33	3.33	3.33
13	3.87	3.87	3.87		7.73	7.73	7.73		3.33	3.33	3.33
14	3.87	3.87	3.87		7.73	7.73	7.73		3.33	3.33	3.33
15	3.87	3.87	3.87		7.73	7.73	7.73		3.33	3.33	3.33
		Fruit firmness (N)				Total soluble solids (%)				pH
control	1	2	3		1	2	3		1	2	3
1	3.88	3.88	3.88		7.94	7.94	7.94		3.34	3.34	3.34
2	3.88	3.88	3.88		7.94	7.94	7.94		3.34	3.34	3.34
3	3.88	3.88	3.88		7.94	7.94	7.94		3.34	3.34	3.34
4	3.88	3.81	3.77		7.94	7.94	7.94		3.34	3.34	3.34
5	3.88	3.88	3.74		7.94	7.94	7.94		3.34	3.34	3.34
6	3.81	3.88	3.88		7.94	7.94	7.94		3.34	3.34	3.34
7	3.88	3.88	3.88		7.94	7.94	7.94		3.34	3.34	3.34
8	3.88	3.88	3.88		7.94	7.94	7.94		3.34	3.34	3.34
9	3.8	3.81	3.88		7.94	7.94	7.94		3.34	3.34	3.34
10	3.88	3.78	3.88		7.94	7.94	7.94		3.34	3.34	3.34
11	3.88	3.88	3.88		7.94	7.94	7.94		3.34	3.34	3.34
12	3.81	3.88	3.88		7.94	7.94	7.94		3.34	3.34	3.34
13	3.88	3.88	3.88		7.94	7.94	7.94		3.34	3.34	3.34
14	3.88	3.88	3.88		7.94	7.94	7.94		3.34	3.34	3.34
15	3.88	3.88	3.88		7.94	7.94	7.94		3.34	3.34	3.34
		Fruit firmness (N)				Total soluble solids (%)				pH
negative control	1	2	3		1	2	3		1	2	3
1	3.82	3.82	3.82		7.85	7.85	7.85		3.36	3.36	3.36
2	3.82	3.82	3.82		7.85	7.85	7.85		3.36	3.36	3.36
3	3.82	3.82	3.82		7.85	7.85	7.85		3.36	3.36	3.36
4	3.85	3.85	3.87		7.87	7.85	7.85		3.36	3.36	3.36
5	3.82	3.82	3.82		7.84	7.85	7.85		3.36	3.36	3.36
6	3.82	3.82	3.82		7.83	7.85	7.85		3.36	3.36	3.36
7	3.82	3.82	3.82		7.85	7.85	7.85		3.36	3.36	3.36
8	3.82	3.8	3.8		7.85	7.85	7.85		3.36	3.36	3.36
9	3.82	3.8	3.8		7.85	7.85	7.85		3.36	3.36	3.36
10	3.82	3.8	3.8		7.85	7.85	7.85		3.36	3.36	3.36
11	3.82	3.8	3.8		7.85	7.85	7.85		3.36	3.36	3.36
12	3.82	3.8	3.8		7.85	7.85	7.85		3.36	3.36	3.36
13	3.82	3.8	3.8		7.85	7.85	7.85		3.36	3.36	3.36
14	3.82	3.8	3.8		7.85	7.85	7.85		3.36	3.36	3.36
15	3.82	3.8	3.8		7.85	7.85	7.85		3.36	3.36	3.36
		Fruit firmness (N)				Total soluble solids (%)				pH
positive control	1	2	3		1	2	3		1	2	3
1	1.2	1.95	1.22		7.73	7.73	7.73		3.36	3.36	3.36
2	1.18	1.95	1.22		7.73	7.73	7.74		3.36	3.36	3.36
3	1.18	1.95	1.22		7.72	7.73	7.73		3.36	3.36	3.36
4	1.18	1.95	1.22		7.72	7.73	7.73		3.36	3.36	3.36
5	1.18	1.95	1.22		7.72	7.73	7.73		3.36	3.36	3.36
6	1.18	1.95	1.22		7.72	7.73	7.74		3.36	3.36	3.36
7	1.18	1.95	1.22		7.72	7.73	7.73		3.36	3.36	3.36
8	1.18	1.95	1.22		7.73	7.73	7.73		3.36	3.36	3.36
9	1.18	1.95	1.22		7.73	7.73	7.73		3.36	3.36	3.36
10	1.18	1.95	1.22		7.73	7.73	7.73		3.36	3.36	3.36
11	1.22	1.95	1.22		7.73	7.73	7.73		3.36	3.36	3.36
12	1.22	1.95	1.22		7.73	7.73	7.73		3.36	3.36	3.36
13	1.22	1.95	1.22		7.73	7.73	7.73		3.36	3.36	3.36
14	1.22	1.95	1.22		7.73	7.73	7.73		3.36	3.36	3.36
15	1.22	1.95	1.22		7.73	7.73	7.73		3.36	3.36	3.36
